# Supplementary material for: Supramolecular assembly of dendronized spiropyrans in aqueous solutions into nanospheres with photo- and thermo-responsive chiralities
Source: Royal Society of Chemistry journal article supplement (doi:10.1039/d3nr03729k), 2023-01-01
Supplement: d3nr03729k1.pdf [file d3nr03729k1.pdf]

*Electronic Supplementary Information*

**Supramolecular assembly of dendronized spiropyrans in aqueous solutions into nanospheres with photo- and thermo- responsive chiralities**

Shanbin Qi, Xueting Lu, Wenli Mei, Guanglei Gu, Wen Li\* and Afang Zhang\*

International Joint Laboratory of Biomimetic and Smart Polymers, School of Materials Science and Engineering, Shanghai University, Nanchen Street 333, Shanghai 200444, China

## Table of Contents

|                                                                                                                                                                                                                                                                                                                                                                                                                                                                                                                                                                                                                                                                                                                                                                              |     |
|------------------------------------------------------------------------------------------------------------------------------------------------------------------------------------------------------------------------------------------------------------------------------------------------------------------------------------------------------------------------------------------------------------------------------------------------------------------------------------------------------------------------------------------------------------------------------------------------------------------------------------------------------------------------------------------------------------------------------------------------------------------------------|-----|
| <b>Fig. S1</b> $^1\text{H}$ (DMSO- $d_6$ ) and $^{13}\text{C}$ ( $\text{CDCl}_3$ ) NMR spectrum of compound <b>2a</b> at 295 K .....                                                                                                                                                                                                                                                                                                                                                                                                                                                                                                                                                                                                                                         | S4  |
| <b>Fig. S2</b> $^1\text{H}$ (DMSO- $d_6$ ) and $^{13}\text{C}$ ( $\text{CDCl}_3$ ) NMR spectrum of compound <b>2c</b> at 295 K .....                                                                                                                                                                                                                                                                                                                                                                                                                                                                                                                                                                                                                                         | S5  |
| <b>Fig. S3</b> $^1\text{H}$ and $^{13}\text{C}$ NMR spectrum of compound <b>SP-GA-MeG1</b> in DMSO- $d_6$ at 295 K .....                                                                                                                                                                                                                                                                                                                                                                                                                                                                                                                                                                                                                                                     | S6  |
| <b>Fig. S4</b> $^1\text{H}$ and $^{13}\text{C}$ NMR spectrum of compound <b>SP-GA-EtG1</b> in DMSO- $d_6$ at 295 K .....                                                                                                                                                                                                                                                                                                                                                                                                                                                                                                                                                                                                                                                     | S7  |
| <b>Fig. S5</b> $^1\text{H}$ and $^{13}\text{C}$ NMR spectrum of compound <b>3a</b> in DMSO- $d_6$ at 295 K .....                                                                                                                                                                                                                                                                                                                                                                                                                                                                                                                                                                                                                                                             | S8  |
| <b>Fig. S6</b> $^1\text{H}$ and $^{13}\text{C}$ NMR spectrum of compound <b>SP-AG-MeG1</b> in DMSO- $d_6$ at 295 K .....                                                                                                                                                                                                                                                                                                                                                                                                                                                                                                                                                                                                                                                     | S9  |
| <b>Fig. S7</b> $^1\text{H}$ and $^{13}\text{C}$ NMR spectrum of compound <b>4a</b> in DMSO- $d_6$ at 295 K .....                                                                                                                                                                                                                                                                                                                                                                                                                                                                                                                                                                                                                                                             | S10 |
| <b>Fig. S8</b> $^1\text{H}$ and $^{13}\text{C}$ NMR spectrum of compound <b>MeG1-GA-SP</b> in DMSO- $d_6$ at 295 K .....                                                                                                                                                                                                                                                                                                                                                                                                                                                                                                                                                                                                                                                     | S11 |
| <b>Fig. S9</b> ESI-MS spectrum of compound <b>2a</b> (pos. mode, THF) .....                                                                                                                                                                                                                                                                                                                                                                                                                                                                                                                                                                                                                                                                                                  | S12 |
| <b>Fig. S10</b> ESI-MS spectrum of compound <b>2c</b> (pos. mode, DCM) .....                                                                                                                                                                                                                                                                                                                                                                                                                                                                                                                                                                                                                                                                                                 | S12 |
| <b>Fig. S11</b> ESI-MS spectrum of compound <b>SP-GA-MeG1</b> (pos. mode, DCM) .....                                                                                                                                                                                                                                                                                                                                                                                                                                                                                                                                                                                                                                                                                         | S12 |
| <b>Fig. S12</b> ESI-MS spectrum of compound <b>SP-GA-EtG1</b> (pos. mode, DCM) .....                                                                                                                                                                                                                                                                                                                                                                                                                                                                                                                                                                                                                                                                                         | S13 |
| <b>Fig. S13</b> ESI-MS spectrum of compound <b>3a</b> (pos. mode, DCM) .....                                                                                                                                                                                                                                                                                                                                                                                                                                                                                                                                                                                                                                                                                                 | S13 |
| <b>Fig. S14</b> ESI-MS spectrum of compound <b>SP-AG-MeG1</b> (pos. mode, DCM) .....                                                                                                                                                                                                                                                                                                                                                                                                                                                                                                                                                                                                                                                                                         | S14 |
| <b>Fig. S15</b> ESI-MS spectrum of compound <b>4a</b> (pos. mode, DCM) .....                                                                                                                                                                                                                                                                                                                                                                                                                                                                                                                                                                                                                                                                                                 | S14 |
| <b>Fig. S16</b> ESI-MS spectrum of compound <b>MeG1-GA-SP</b> (pos. mode, DCM) .....                                                                                                                                                                                                                                                                                                                                                                                                                                                                                                                                                                                                                                                                                         | S14 |
| <b>Fig. S17</b> CD spectra of <b>SP-GA-MeG1</b> in aqueous solutions with different concentration at 10 °C .....                                                                                                                                                                                                                                                                                                                                                                                                                                                                                                                                                                                                                                                             | S15 |
| <b>Fig. S18</b> UV/vis spectra in water of <b>SP-GA-EtG1</b> after irradiation with UV (a) and re-irradiation with visible light (b), of <b>SP-AG-MeG1</b> after irradiation with UV (d) and re-irradiation with visible light (e) and of <b>MeG1-GA-SP</b> after irradiation with UV (g) and re-irradiation with visible light (h), as well as absorbance at 516 nm after alternative irradiation with UV and visible light for <b>SP-GA-EtG1</b> (c), <b>SP-AG-MeG1</b> (f), <b>MeG1-GA-SP</b> (i). Insets in (a), (b), (d), (e), (g) and (h): plots of abs at around 516 nm against irradiation time. $\lambda_{\text{UV}} = 254 \text{ nm}$ ; $\lambda_{\text{vis}} > 450 \text{ nm}$ ; $T = 10 \text{ }^\circ\text{C}$ , $C = 0.15 \text{ mg}\cdot\text{mL}^{-1}$ ..... | S15 |
| <b>Fig. S19</b> Fluorescence spectra in water of <b>SP-GA-EtG1</b> after irradiation with UV (a) and re-irradiation with visible light (b), of <b>SP-AG-MeG1</b> after irradiation with UV (d) and re-irradiation with visible light (e), and of <b>MeG1-GA-SP</b> after irradiation with UV (g) and re-irradiation with visible light (h), as well as fluorescence intensity at 630 nm after alternative irradiation with UV and visible light for <b>SP-GA-EtG1</b> (c), <b>SP-AG-MeG1</b> (f), and <b>MeG1-GA-SP</b> (i). $\lambda_{\text{ex}} = 535 \text{ nm}$ , $\lambda_{\text{UV}} = 254 \text{ nm}$ , $\lambda_{\text{vis}} > 450 \text{ nm}$ , $T = 10 \text{ }^\circ\text{C}$ , $C = 0.15 \text{ mg}\cdot\text{mL}^{-1}$ .....                                    | S16 |
| <b>Fig. S20</b> Plots of hydrodynamic radius of <b>SP-GA-EtG1</b> (a), <b>SP-AG-MeG1</b> (b), and <b>MeG1-GA-SP</b> (c) after irradiation with UV and visible light. $\lambda_{\text{UV}} = 254 \text{ nm}$ ; $\lambda_{\text{vis}} > 450 \text{ nm}$ ; $T = 10 \text{ }^\circ\text{C}$ , $C = 0.15 \text{ mg}\cdot\text{mL}^{-1}$ .....                                                                                                                                                                                                                                                                                                                                                                                                                                     | S16 |
| <b>Fig. S21</b> AFM images of <b>SP-GA-EtG1</b> after irradiation with UV (a) and visible light (b), <b>SP-AG-MeG1</b> after irradiation with UV (c) and visible light (d), as well as <b>MeG1-GA-SP</b> after irradiation with UV (e) and visible light (f). $\lambda_{\text{UV}} = 254 \text{ nm}$ ; $\lambda_{\text{vis}} > 450 \text{ nm}$ ; $T = 10 \text{ }^\circ\text{C}$ , $C = 0.15 \text{ mg}\cdot\text{mL}^{-1}$ , scale bar = 2 $\mu\text{m}$ .....                                                                                                                                                                                                                                                                                                              | S17 |
| <b>Fig. S22</b> CD and UV/vis spectra in aqueous solutions of <b>SP-GA-EtG1</b> irradiated by UV (a) and re-irradiation with visible light (b), of <b>SP-AG-MeG1</b> irradiated by UV (c) and re-irradiation with visible light (d), as well as <b>MeG1-GA-SP</b> irradiated by UV (e) and re-irradiation with visible light (f). Insets in (a), (b), (c), (d), (e) and (f): plots of molar ellipticity at around 380 nm ( $\theta_{380}$ ) against                                                                                                                                                                                                                                                                                                                          |     |

irradiation time.  $\lambda_{UV} = 254 \text{ nm}$ ;  $\lambda_{vis} > 450 \text{ nm}$ ;  $T = 10 \text{ }^\circ\text{C}$ ,  $C = 0.3 \text{ mg}\cdot\text{mL}^{-1}$  .....S18

**Fig. S23** Plots of transmittance versus temperature for **SP-GA-EtG1** (a), **SP-AG-MeG1** (b) and **MeG1-GA-SP** (c). Heating rate =  $0.5 \text{ }^\circ\text{C}\cdot\text{min}^{-1}$ ,  $C = 0.5 \text{ mg}\cdot\text{mL}^{-1}$ , wavelength =  $700 \text{ nm}$ . Inset: photographs of the aqueous solutions below and above the  $T_{cps}$  .....S19

**Fig. S24** Microscopic photographs of **SP-GA-EtG1** below (a) and above (b) the  $T_{cp}$ , **SP-AG-MeG1** below (c) and above (d) the  $T_{cp}$ , as well as **MeG1-GA-SP** below (e) and above (f) the  $T_{cp}$ .  $C = 0.5 \text{ mg}\cdot\text{mL}^{-1}$  .....S19

**Fig. S25** CD and UV/vis spectra in aqueous solutions of **SP-GA-EtG1** through heating (a) and cooling (b), **SP-AG-MeG1** through heating (d) and cooling (e), **MeG1-GA-SP** through heating (g) and cooling (h), as well as the first Cotton effect at around  $380 \text{ nm}$  ( $\theta_{380}$ ) after several cycles heating and cooling (through irradiation with visible light): **SP-GA-EtG1** (c), **SP-AG-MeG1** (f), **MeG1-GA-SP** (i). Inset in (a), (b), (d), (e), (g) and (h): plots of molar ellipticity at around  $380 \text{ nm}$  ( $\theta$ ) against temperature. Heating rate =  $2.0 \text{ }^\circ\text{C}\cdot\text{min}^{-1}$ ;  $\lambda_{vis} > 450 \text{ nm}$ ;  $C = 0.3 \text{ mg}\cdot\text{mL}^{-1}$  .....S20

**Fig. S26**  $^1\text{H}$  NMR spectra in  $\text{D}_2\text{O}$  at varied temperatures of **SP-GA-EtG1** (a), **SP-AG-MeG1** (b) and **MeG1-GA-SP** (c).  $C = 2.5 \text{ mg}\cdot\text{mL}^{-1}$  .....S21

**Fig. S27** NOESY spectra of **SP-GA-EtG1** at  $10 \text{ }^\circ\text{C}$  (a) and  $55 \text{ }^\circ\text{C}$  (b), **SP-AG-MeG1** at  $10 \text{ }^\circ\text{C}$  (c) and  $50 \text{ }^\circ\text{C}$  (d), as well as **MeG1-GA-SP** at  $10 \text{ }^\circ\text{C}$  (e) and  $50 \text{ }^\circ\text{C}$  (f).  $C = 5 \text{ mg}\cdot\text{mL}^{-1}$  .....S22

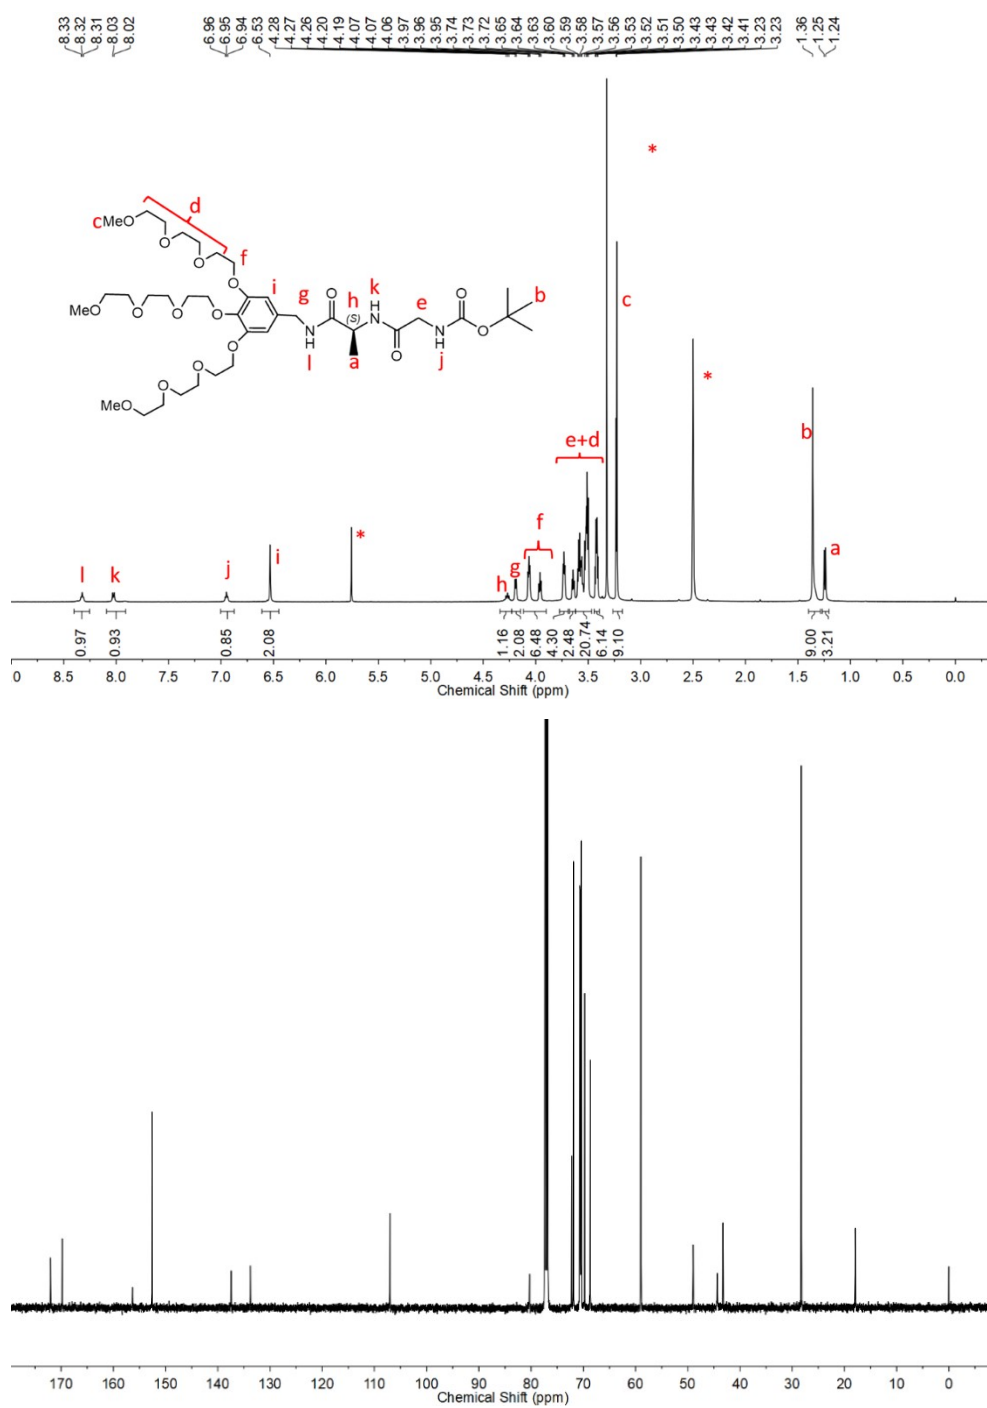

**Fig. S1**  $^1\text{H}$  ( $\text{DMSO-}d_6$ ) and  $^{13}\text{C}$  ( $\text{CDCl}_3$ ) NMR spectrum of compound **2a** at 295 K.

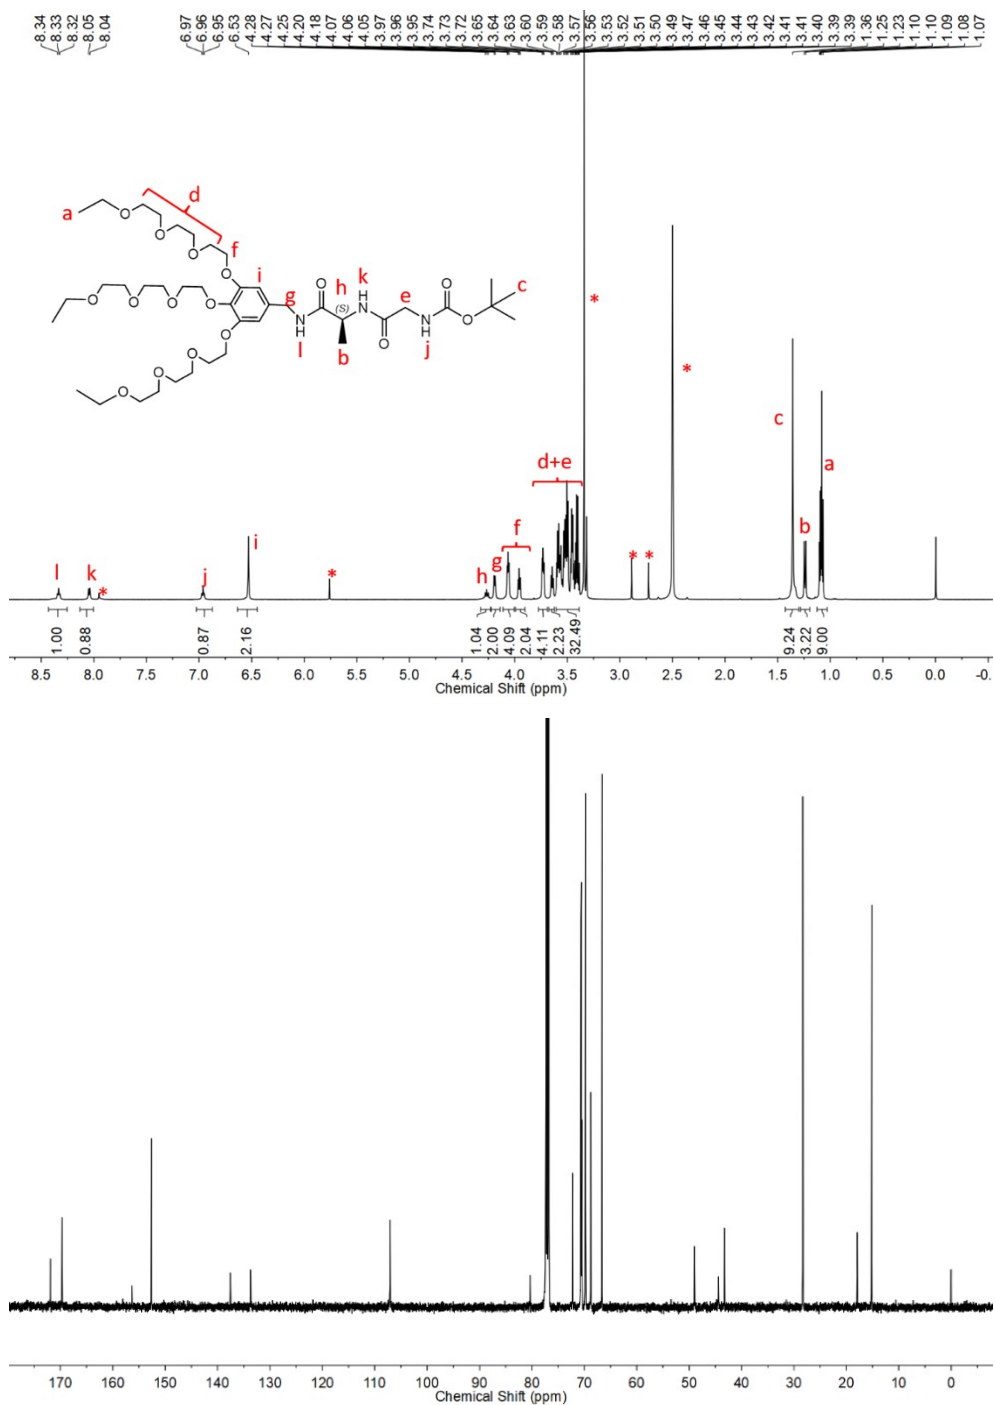

Fig. S2 <sup>1</sup>H (DMSO-d<sub>6</sub>) and <sup>13</sup>C (CDCl<sub>3</sub>) NMR spectrum of compound **2c** at 295 K.

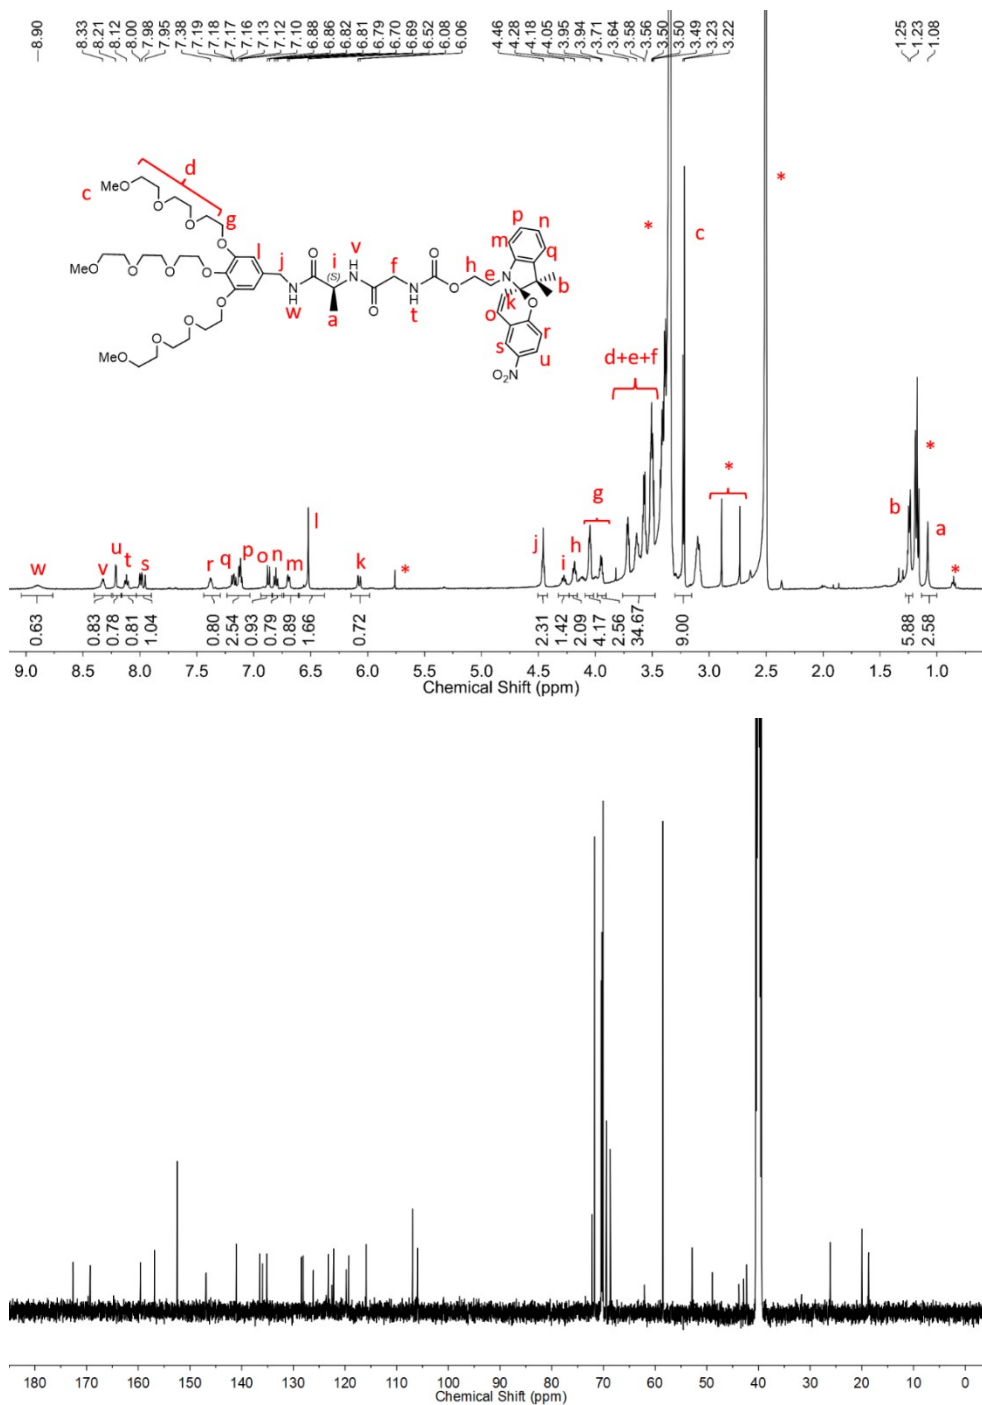

**Fig. S3**  $^1\text{H}$  and  $^{13}\text{C}$  NMR spectrum of compound SP-GA-MeG1 in  $\text{DMSO-}d_6$  at 295 K.

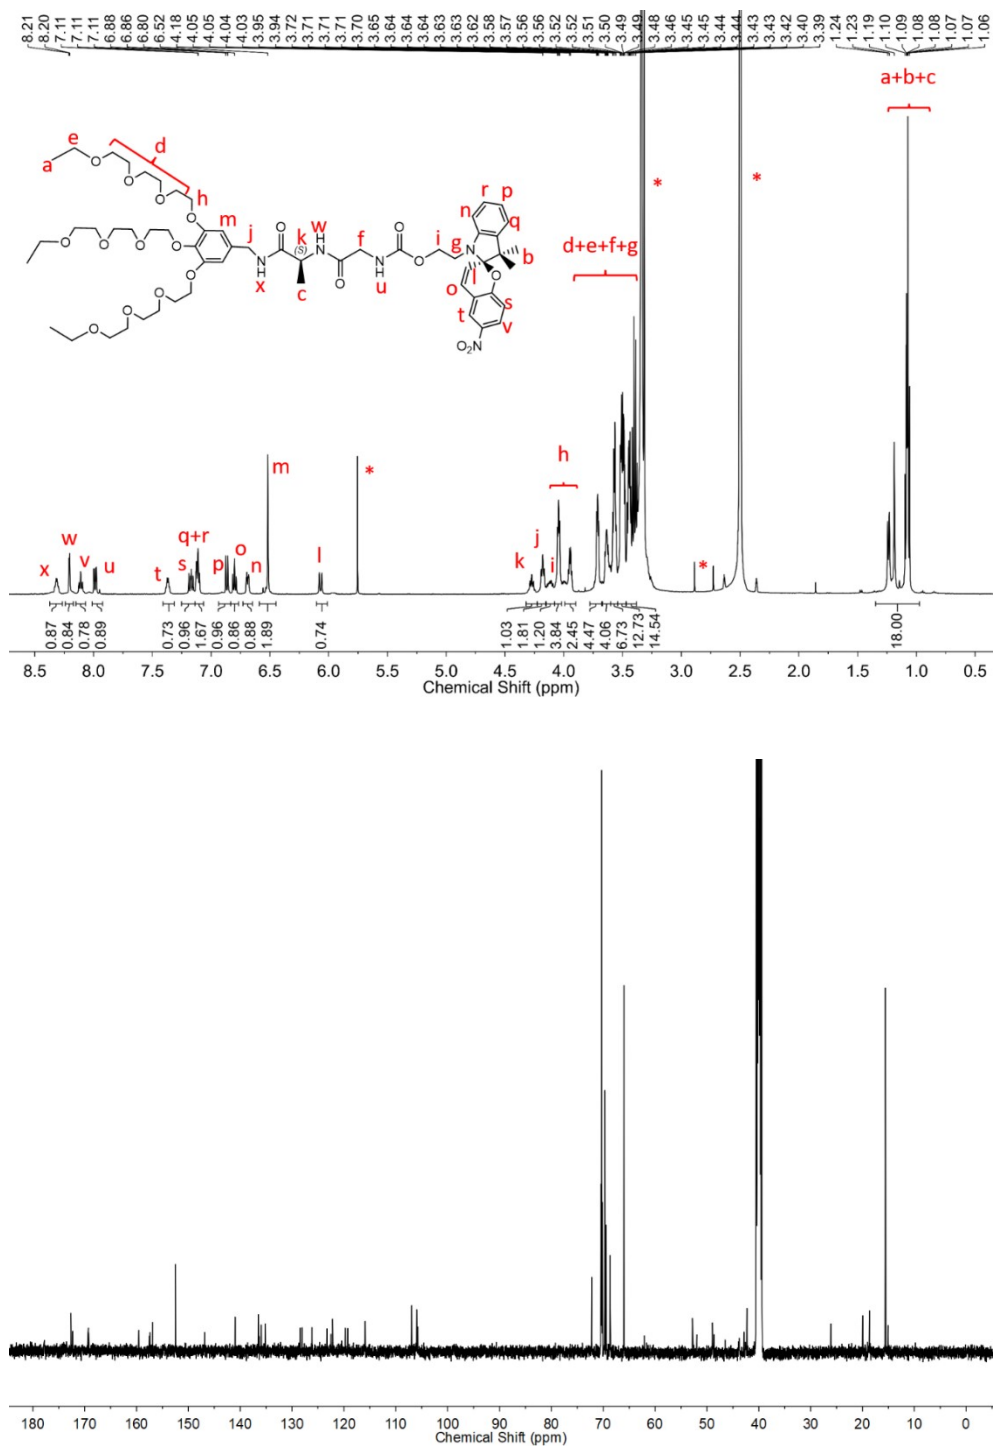

Fig. S4  $^1\text{H}$  and  $^{13}\text{C}$  NMR spectrum of compound SP-GA-EtG1 in  $\text{DMSO-}d_6$  at 295 K.

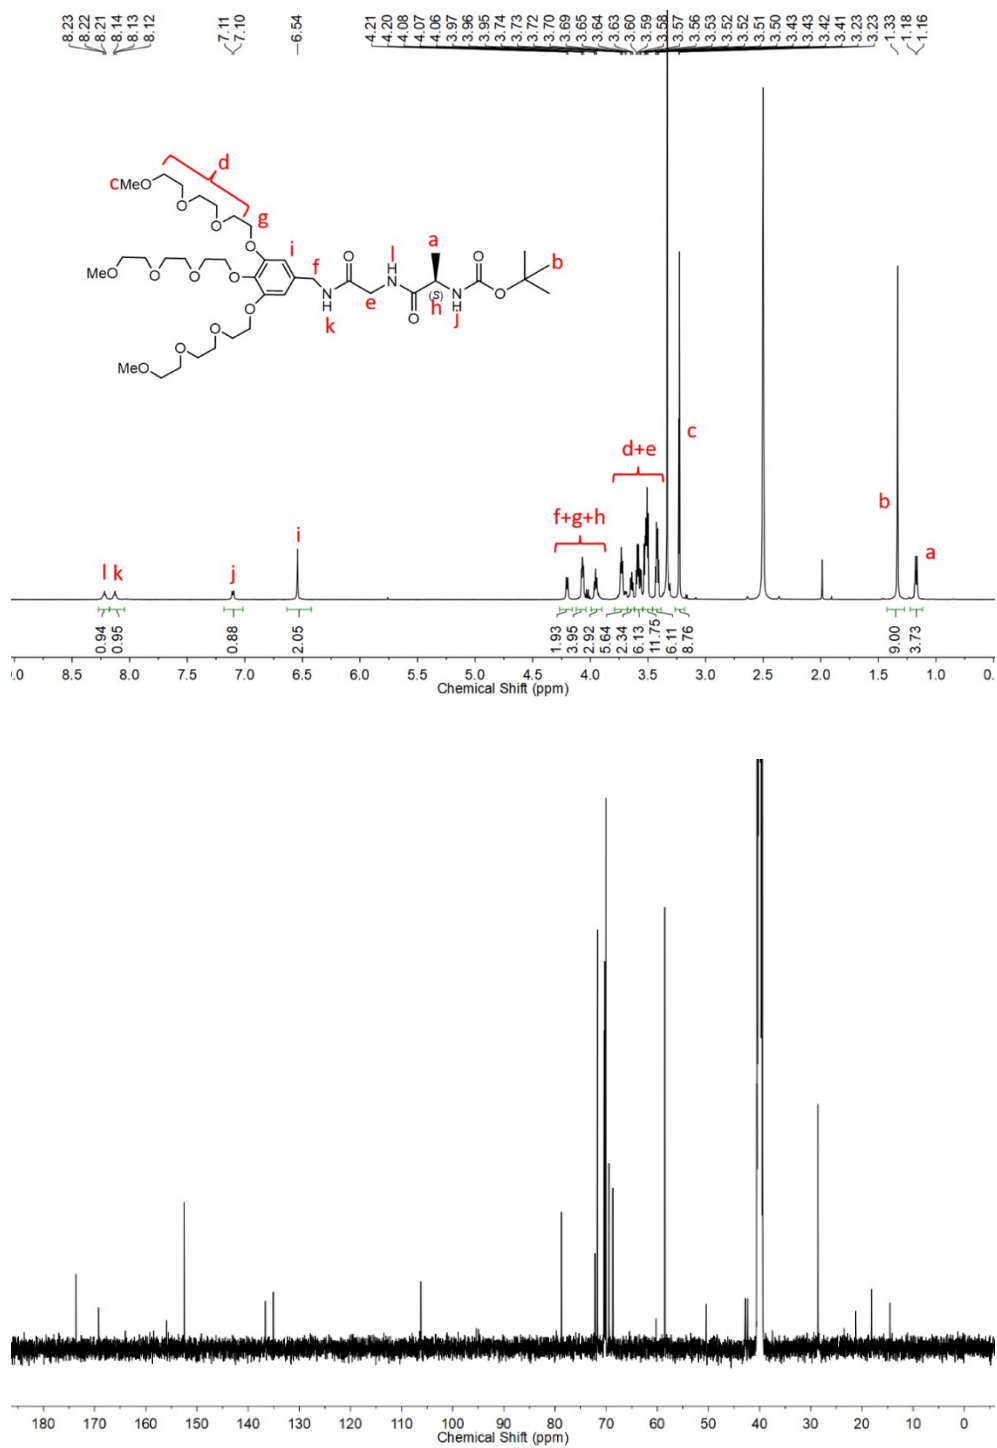

**Fig. S5** <sup>1</sup>H and <sup>13</sup>C NMR spectrum of compound **3a** in DMSO-*d*<sub>6</sub> at 295 K.



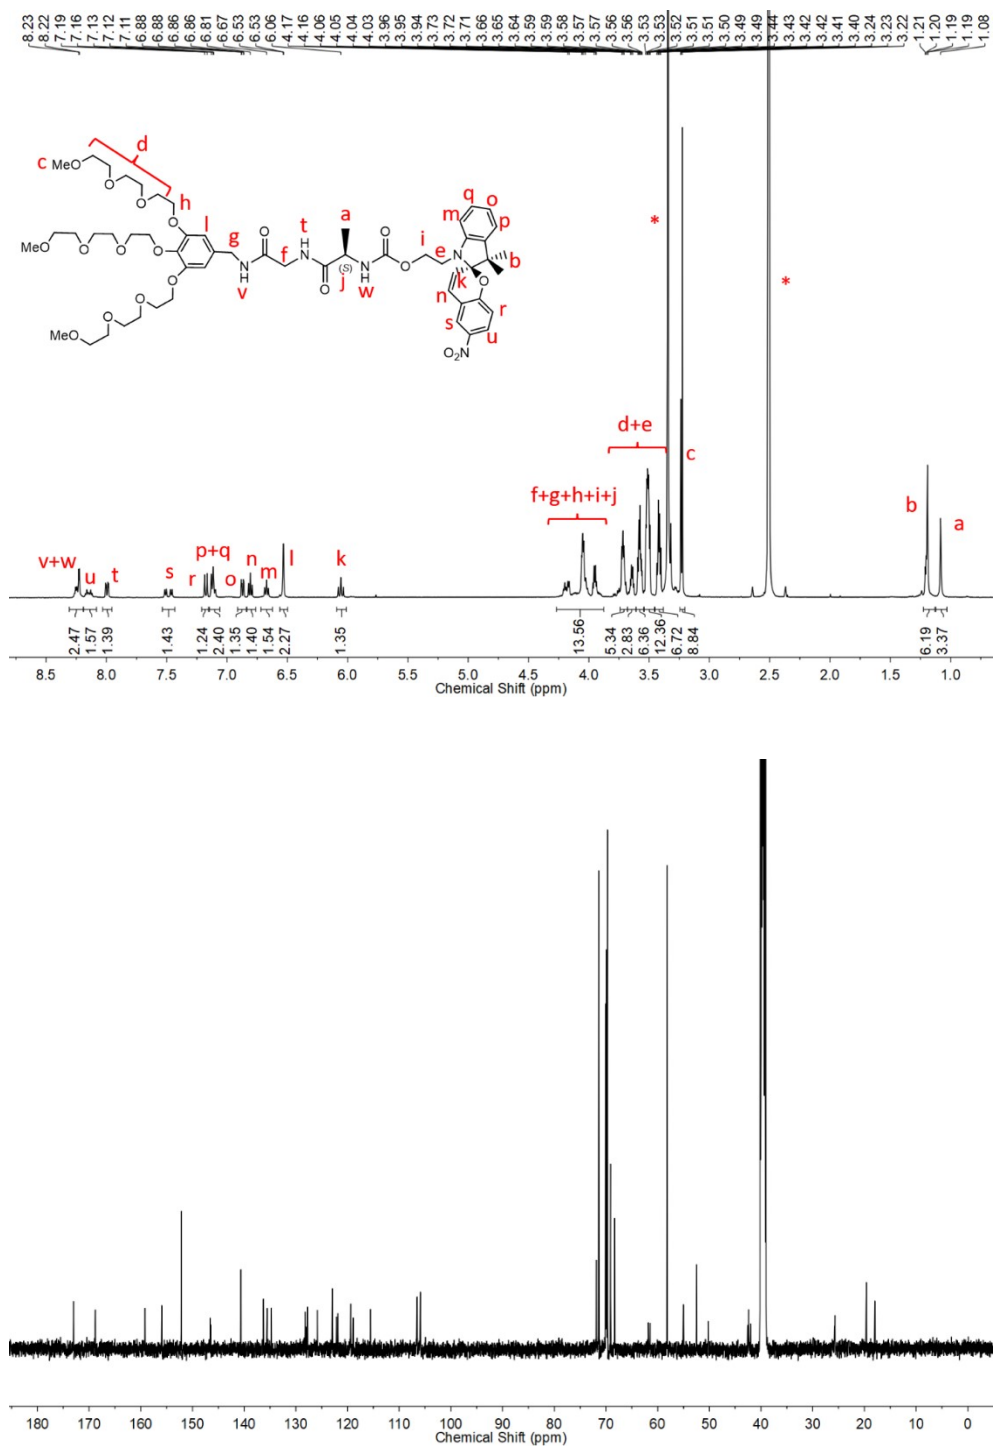

Fig. S6  $^1\text{H}$  and  $^{13}\text{C}$  NMR spectrum of compound SP-AG-MeG1 in  $\text{DMSO}-d_6$  at 295 K.

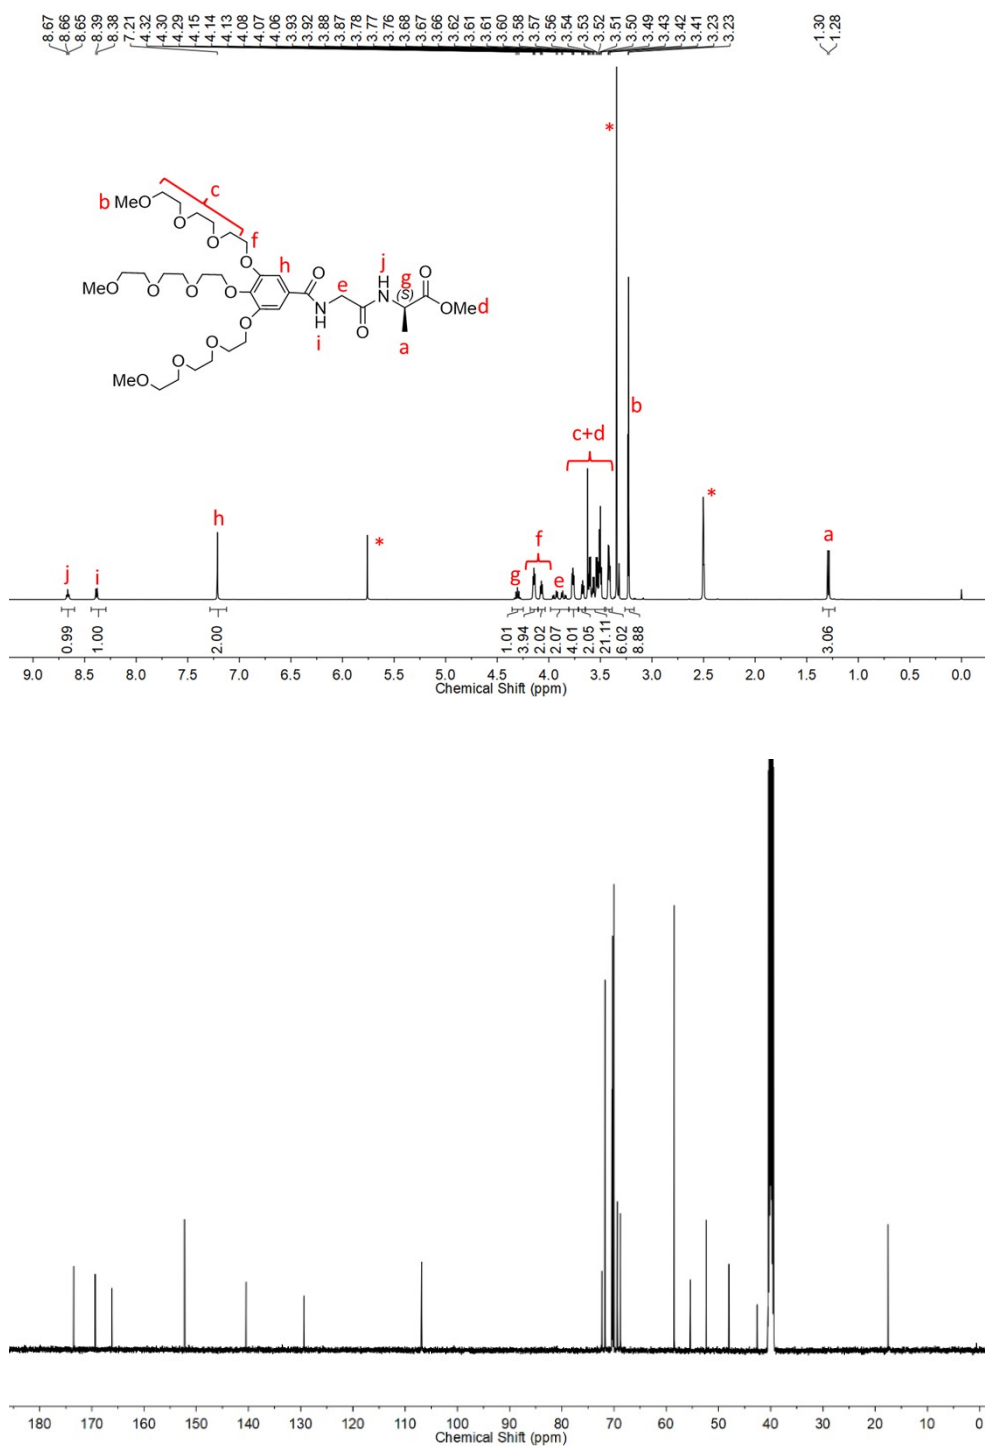

**Fig. S7**  $^1\text{H}$  and  $^{13}\text{C}$  NMR spectrum of compound **4a** in  $\text{DMSO-}d_6$  at 295 K.

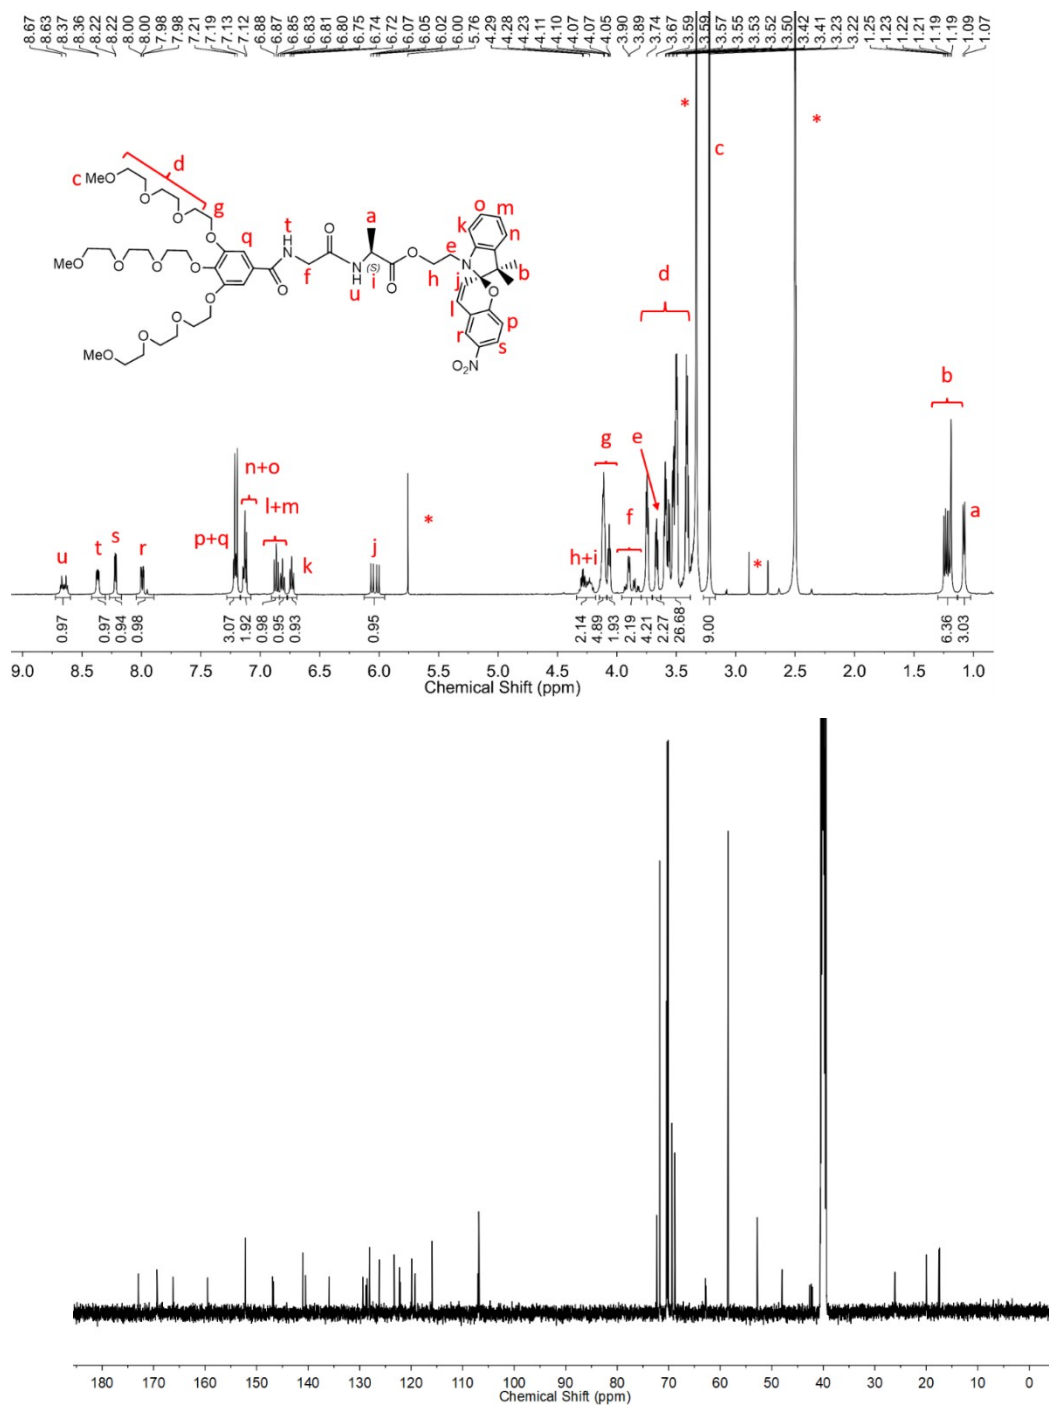

**Fig. S8**  $^1\text{H}$  and  $^{13}\text{C}$  NMR spectrum of compound MeG1-GA-SP in  $\text{DMSO-}d_6$  at 295 K.

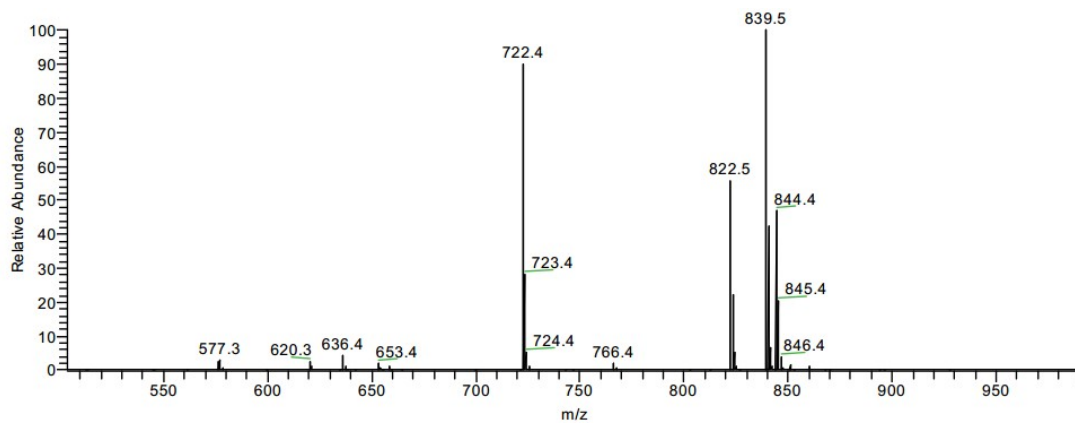

**Fig. S9** ESI-MS spectrum of compound **2a** (pos. mode, THF).

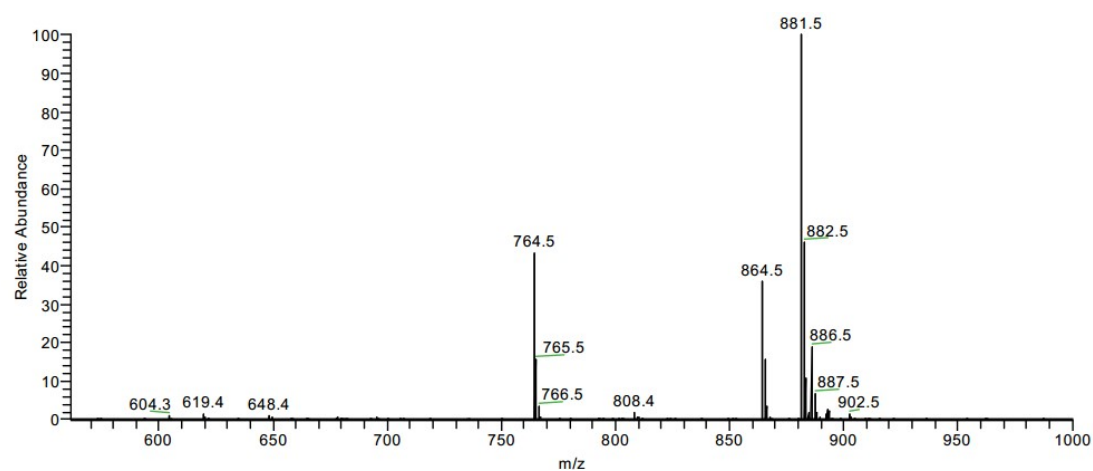

**Fig. S10** ESI-MS spectrum of compound **2c** (pos. mode, DCM).

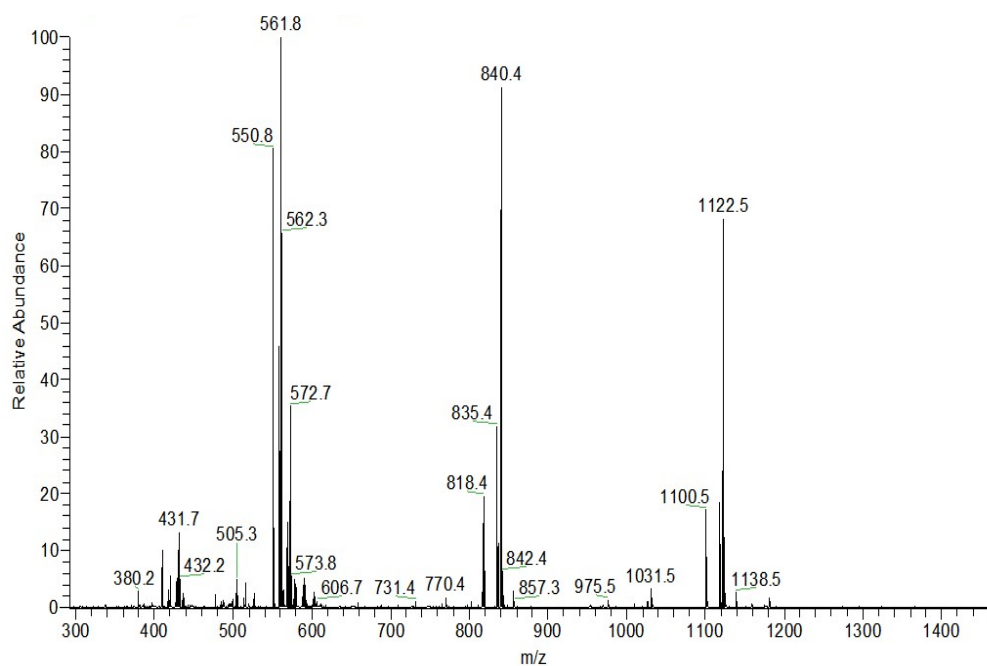

**Fig. S11** ESI-MS spectrum of compound **SP-GA-MeG1** (pos. mode, DCM).

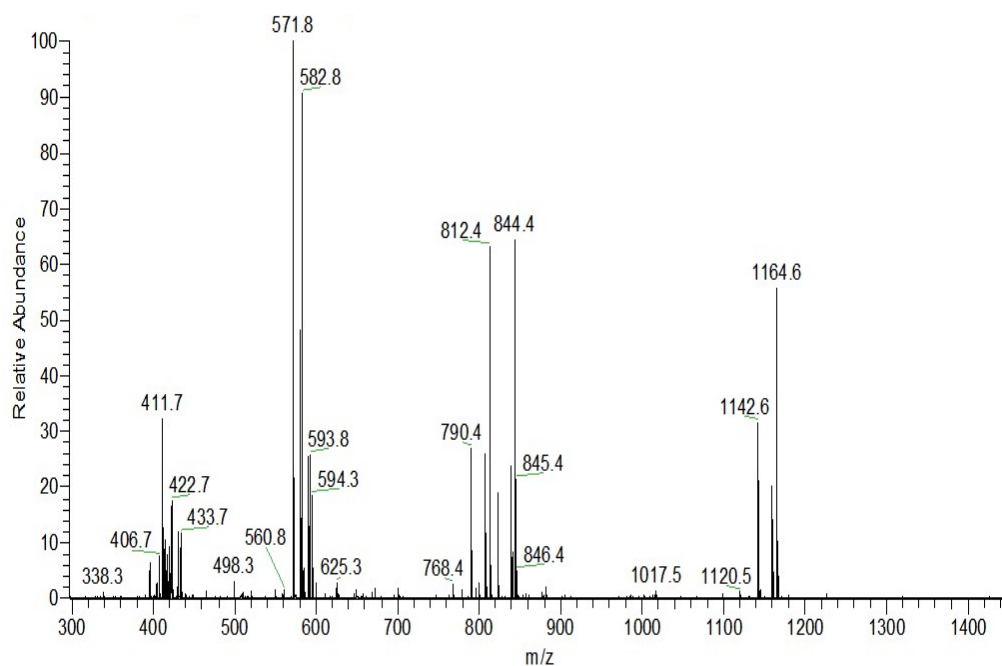

**Fig. S12** ESI-MS spectrum of compound **SP-GA-EtG1** (pos. mode, DCM).

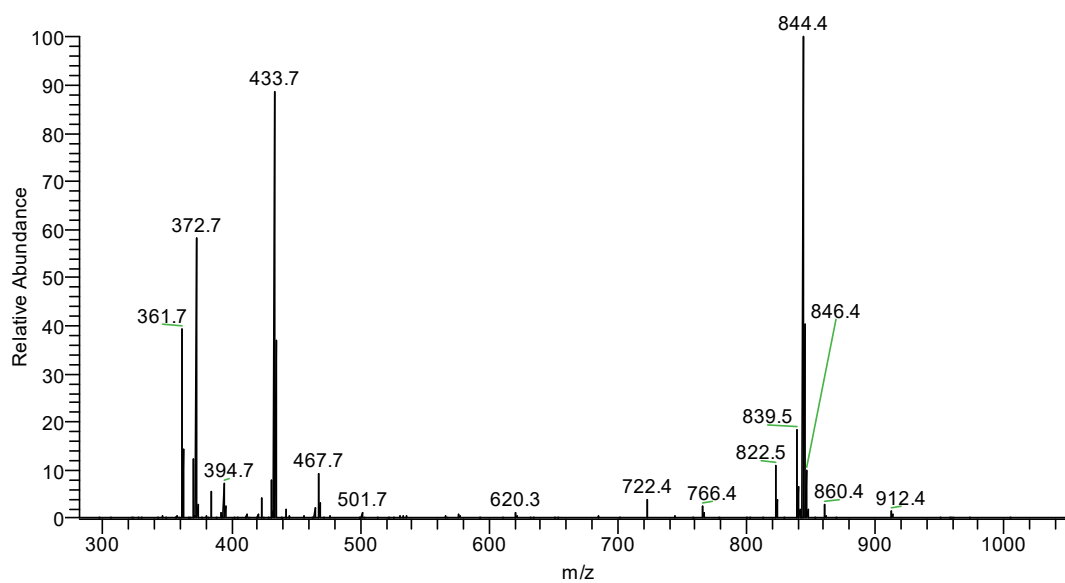

**Fig. S13** ESI-MS spectrum of compound **3a** (pos. mode, DCM).

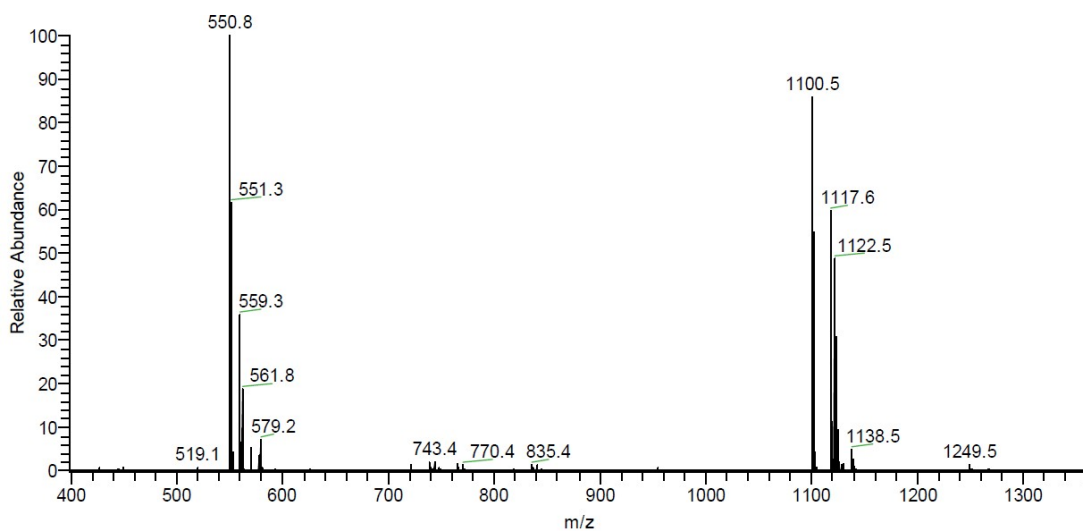

**Fig. S14** ESI-MS spectrum of compound SP-AG-MeG1 (pos. mode, DCM).

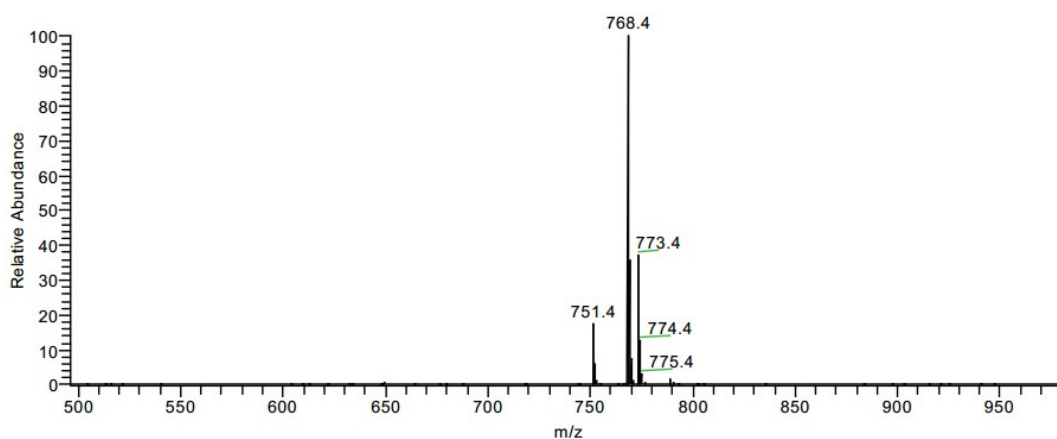

**Fig. S15** ESI-MS spectrum of compound 4a (pos. mode, DCM).

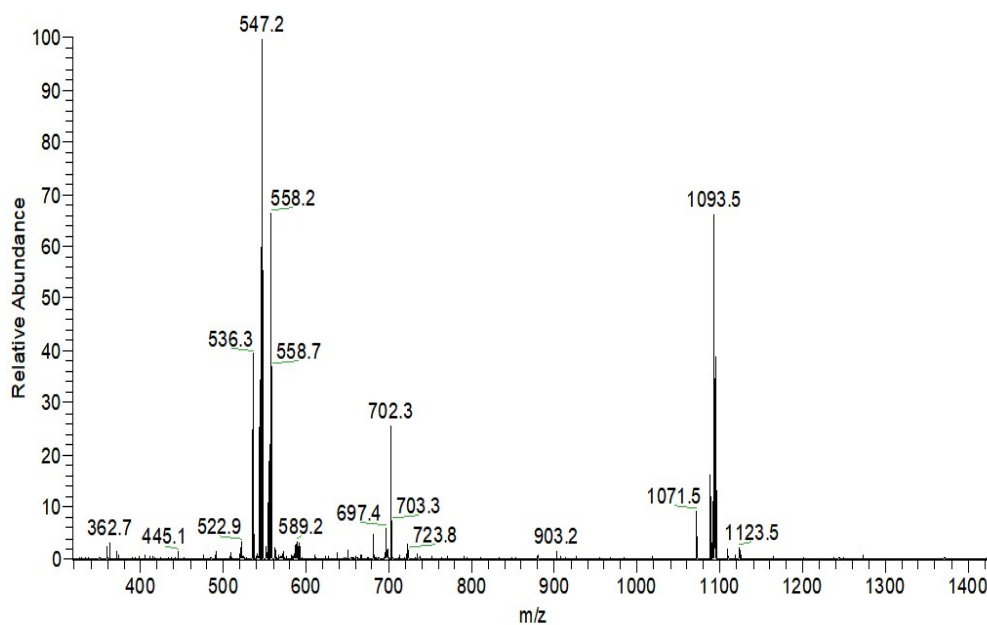

**Fig. S16** ESI-MS spectrum of compound MeG1-GA-SP (pos. mode, DCM).

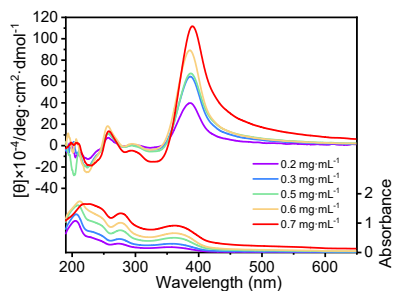

**Fig. 17** CD spectra of SP-GA-MeG1 in aqueous solutions with different concentration at 10 °C.

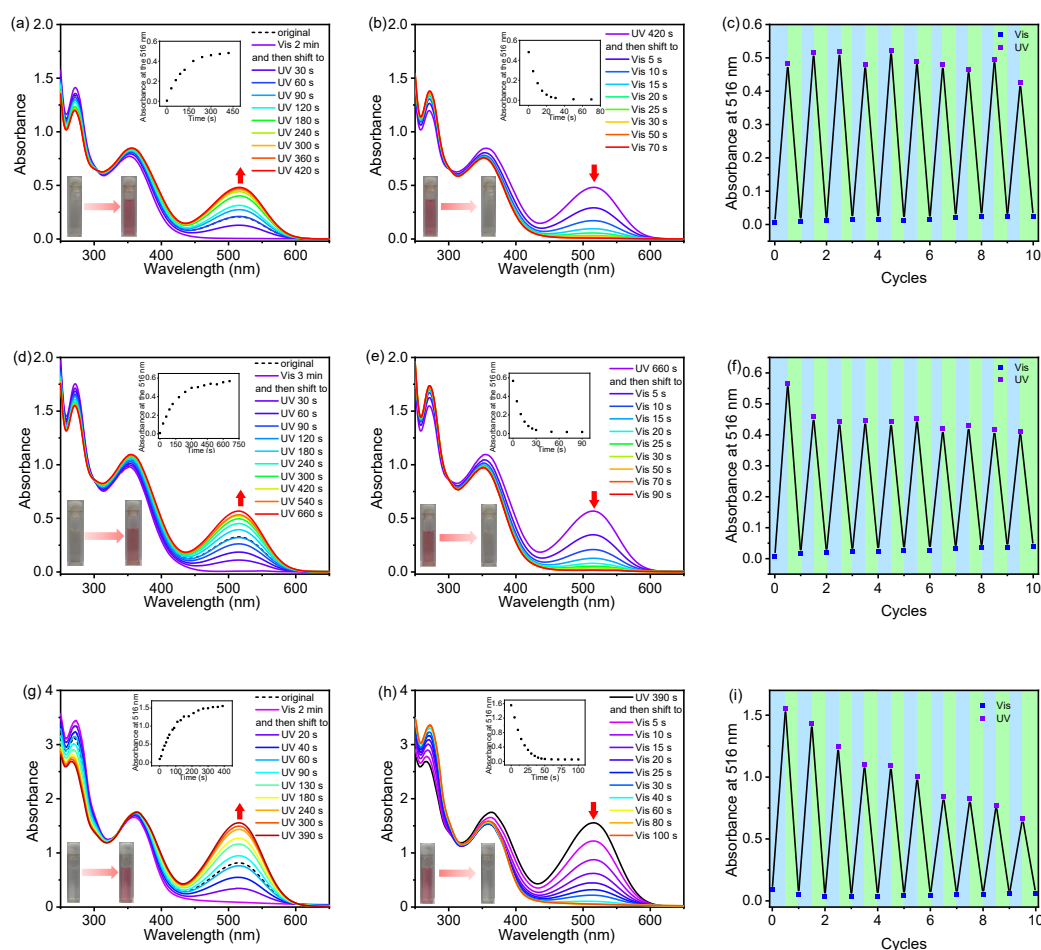

**Fig. S18** UV/vis spectra in water of SP-GA-EtG1 after irradiation with UV (a) and re-irradiation with visible light (b), of SP-AG-MeG1 after irradiation with UV (d) and re-irradiation with visible light (e) and of MeG1-GA-SP after irradiation with UV (g) and re-irradiation with visible light (h), as well as absorbance at 516 nm after alternative irradiation with UV and visible light for SP-GA-EtG1 (c), SP-AG-MeG1 (f), MeG1-GA-SP (i). Insets in (a), (b), (d), (e), (g) and (h): plots of abs at around 516 nm against irradiation time.  $\lambda_{UV} = 254$  nm;  $\lambda_{Vis} > 450$  nm; T = 10 °C, C = 0.15 mg·mL<sup>-1</sup>.

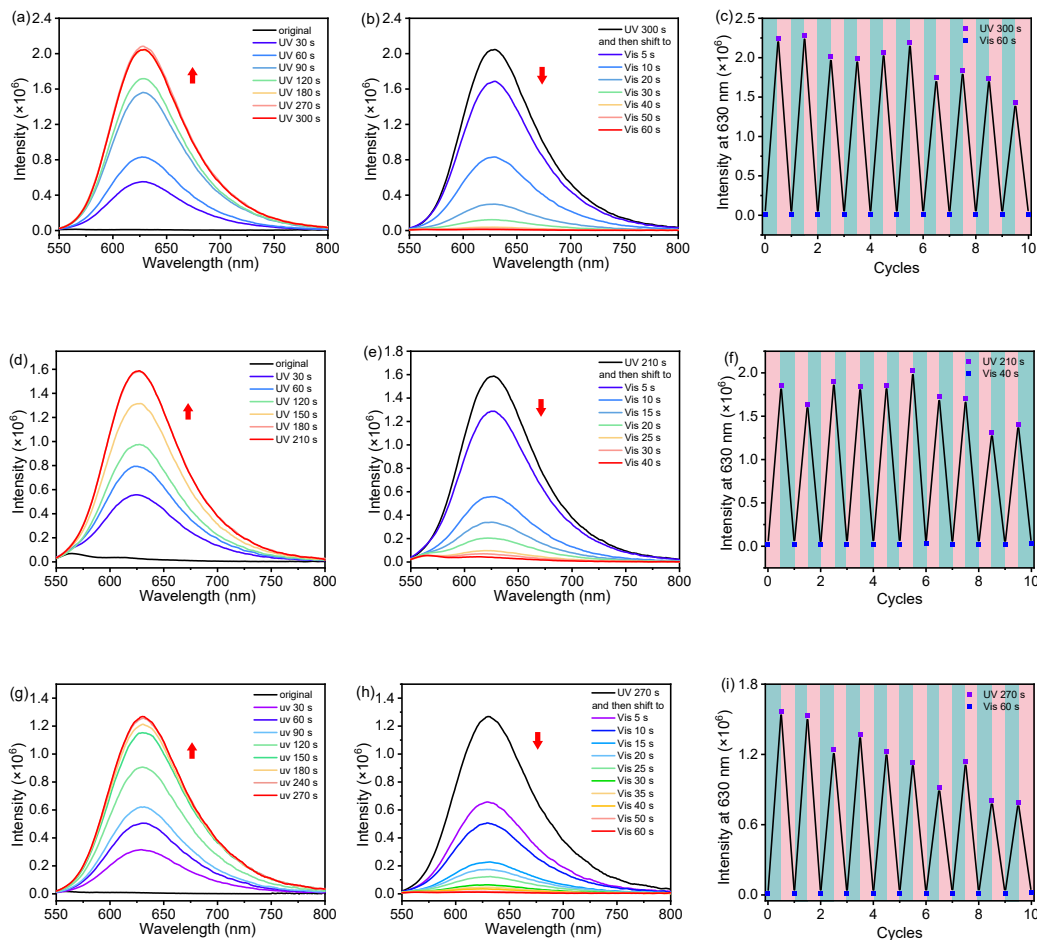

**Fig. S19** Fluorescence spectra in water of SP-GA-EtG1 after irradiation with UV (a) and re-irradiation with visible light (b), of SP-AG-MeG1 after irradiation with UV (d) and re-irradiation with visible light (e), and of MeG1-GA-SP after irradiation with UV (g) and re-irradiation with visible light (h), as well as fluorescence intensity at 630 nm after alternative irradiation with UV and visible light for SP-GA-EtG1 (c), SP-AG-MeG1 (f), and MeG1-GA-SP (i).  $\lambda_{\text{ex}} = 535 \text{ nm}$ ,  $\lambda_{\text{UV}} = 254 \text{ nm}$ ,  $\lambda_{\text{Vis}} > 450 \text{ nm}$ ,  $T = 10 \text{ }^\circ\text{C}$ ,  $C = 0.15 \text{ mg}\cdot\text{mL}^{-1}$ .

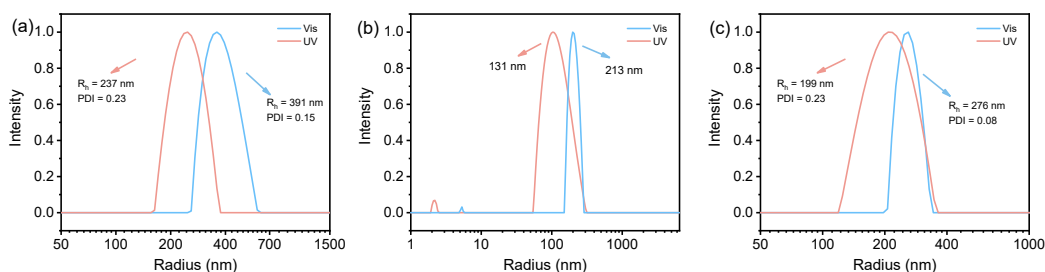

**Fig. S20** Plots of hydrodynamic radius of SP-GA-EtG1 (a), SP-AG-MeG1 (b), and MeG1-GA-SP (c) after irradiation with UV and visible light.  $\lambda_{\text{UV}} = 254 \text{ nm}$ ;  $\lambda_{\text{Vis}} > 450 \text{ nm}$ ;  $T = 10 \text{ }^\circ\text{C}$ ,  $C = 0.15 \text{ mg}\cdot\text{mL}^{-1}$ .



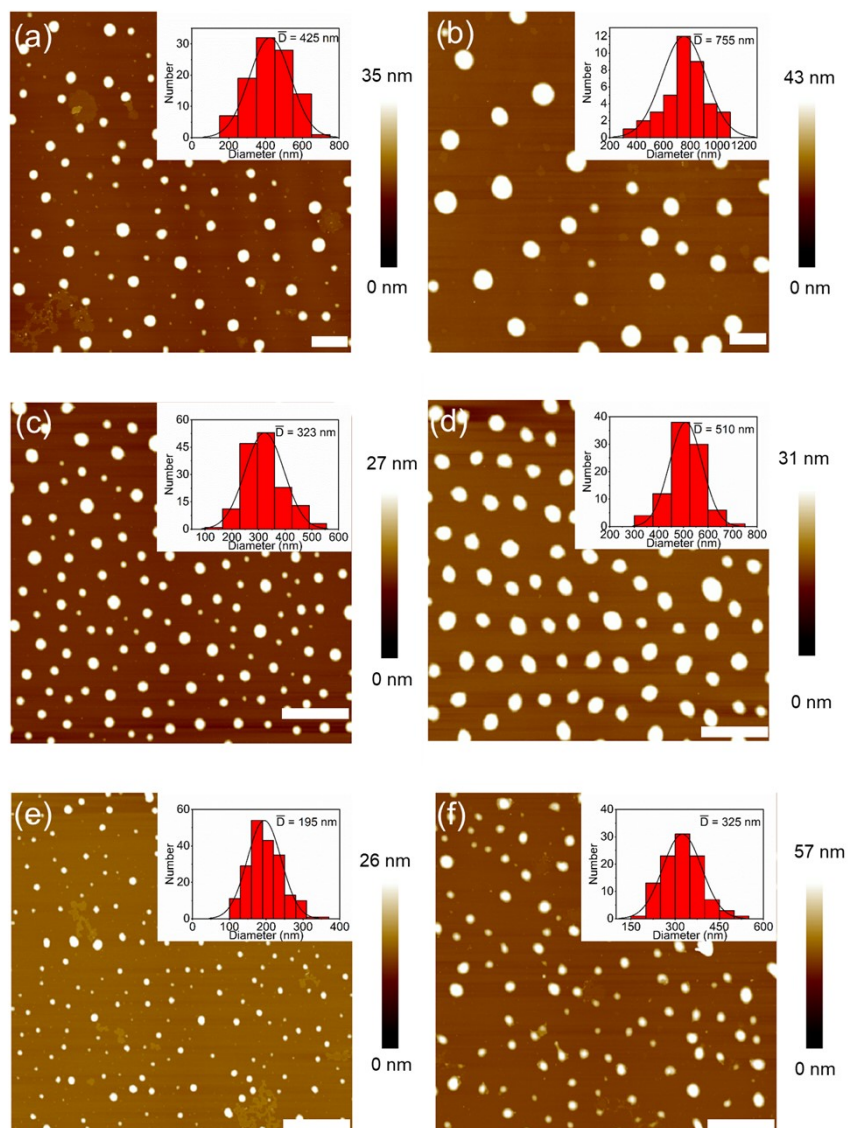

**Fig. S21** AFM images of SP-GA-EtG1 after irradiation with UV (a) and visible light (b), SP-AG-MeG1 after irradiation with UV (c) and visible light (d), as well as MeG1-GA-SP after irradiation with UV (e) and visible light (f).  $\lambda_{UV} = 254$  nm;  $\lambda_{Vis} > 450$  nm;  $T = 10$  °C,  $C = 0.15$  mg·mL<sup>-1</sup>, scale bar = 2  $\mu$ m.

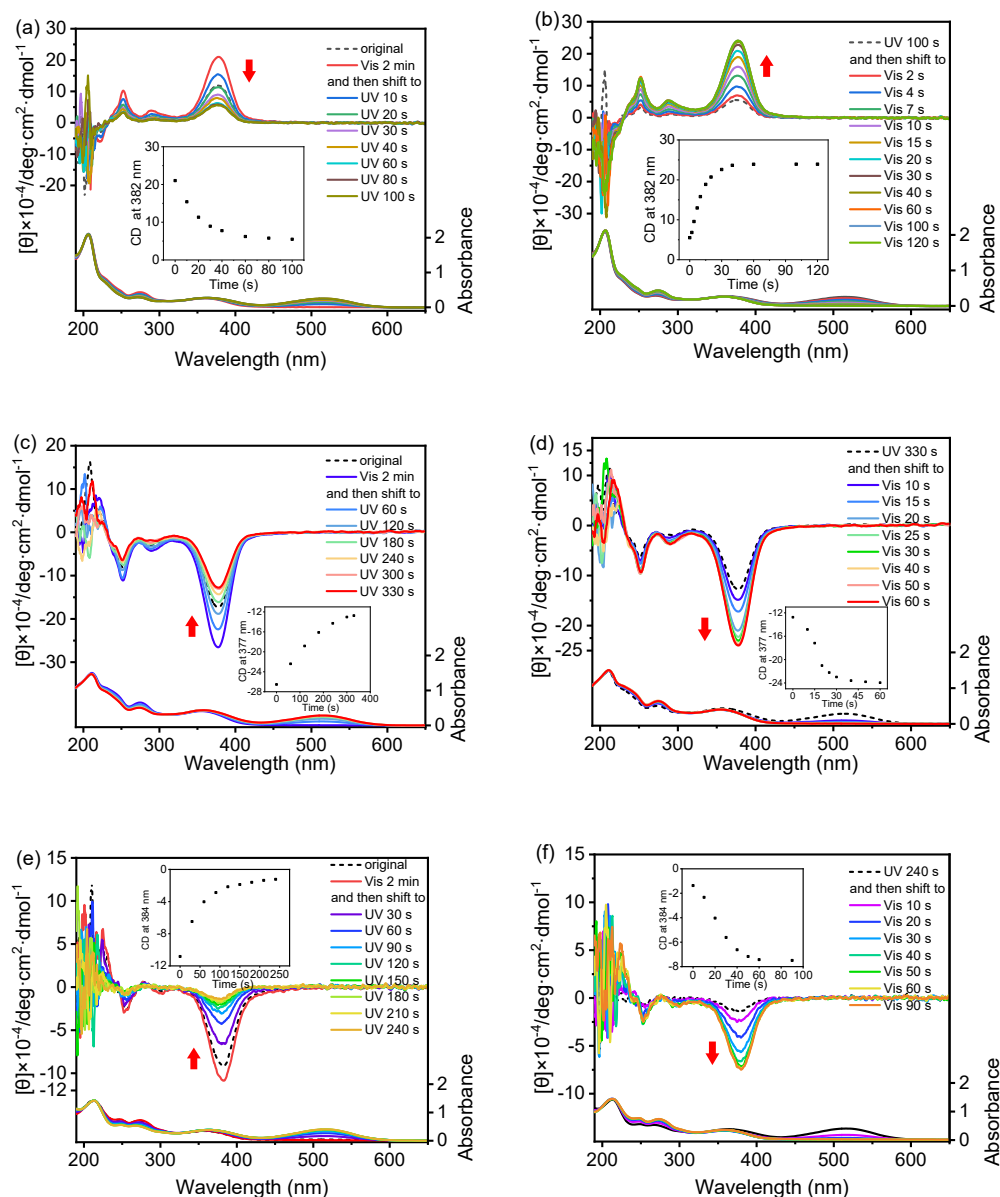

**Fig. S22** CD and UV/vis spectra in aqueous solutions of **SP-GA-EtG1** irradiated by UV (a) and re-irradiation with visible light (b), of **SP-AG-MeG1** irradiated by UV (c) and re-irradiation with visible light (d), as well as **MeG1-GA-SP** irradiated by UV (e) and re-irradiation with visible light (f). Insets in (a), (b), (c), (d), (e) and (f): plots of molar ellipticity at around 380 nm ( $\theta_{380}$ ) against irradiation time.  $\lambda_{UV} = 254$  nm;  $\lambda_{Vis} > 450$  nm;  $T = 10$  °C,  $C = 0.3$  mg·mL<sup>-1</sup>.

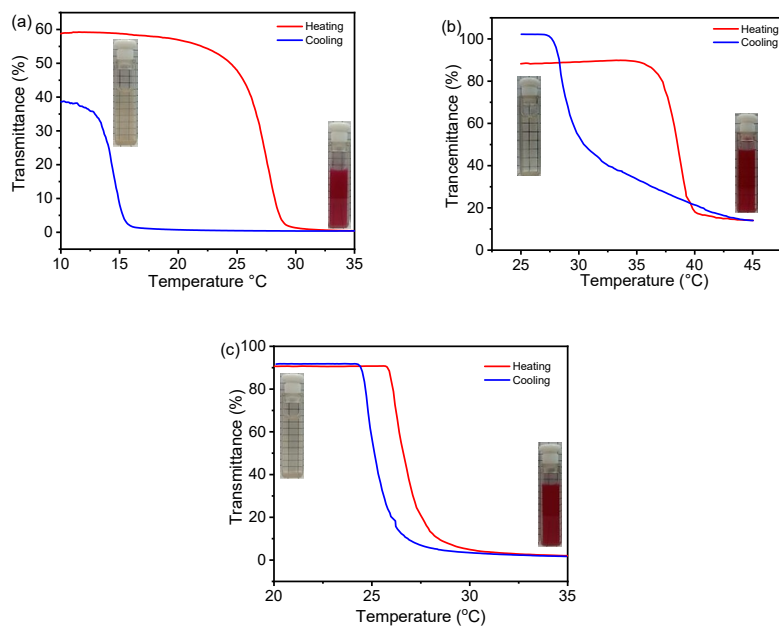

**Fig. S23** Plots of transmittance versus temperature for **SP-GA-EtG1** (a), **SP-AG-MeG1** (b) and **MeG1-GA-SP** (c). Heating rate =  $0.5\text{ }^{\circ}\text{C}\cdot\text{min}^{-1}$ ,  $C = 0.5\text{ mg}\cdot\text{mL}^{-1}$ , wavelength =  $700\text{ nm}$ . Inset: photographs of the aqueous solutions below and above their  $T_{\text{cps}}$ .

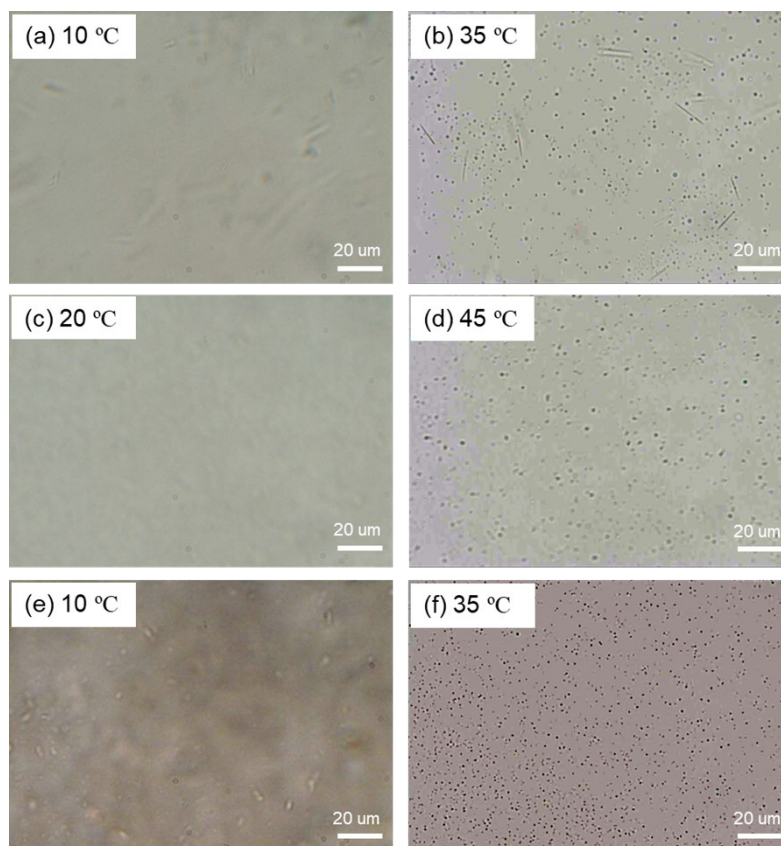

**Fig. S24** Microscopic photographs of **SP-GA-EtG1** below (a) and above (b) the  $T_{\text{cp}}$ , **SP-AG-MeG1** below (c) and above (d) the  $T_{\text{cp}}$ , as well as **MeG1-GA-SP** below (e) and above (f) the  $T_{\text{cp}}$ .  $C = 0.5\text{ mg}\cdot\text{mL}^{-1}$ .

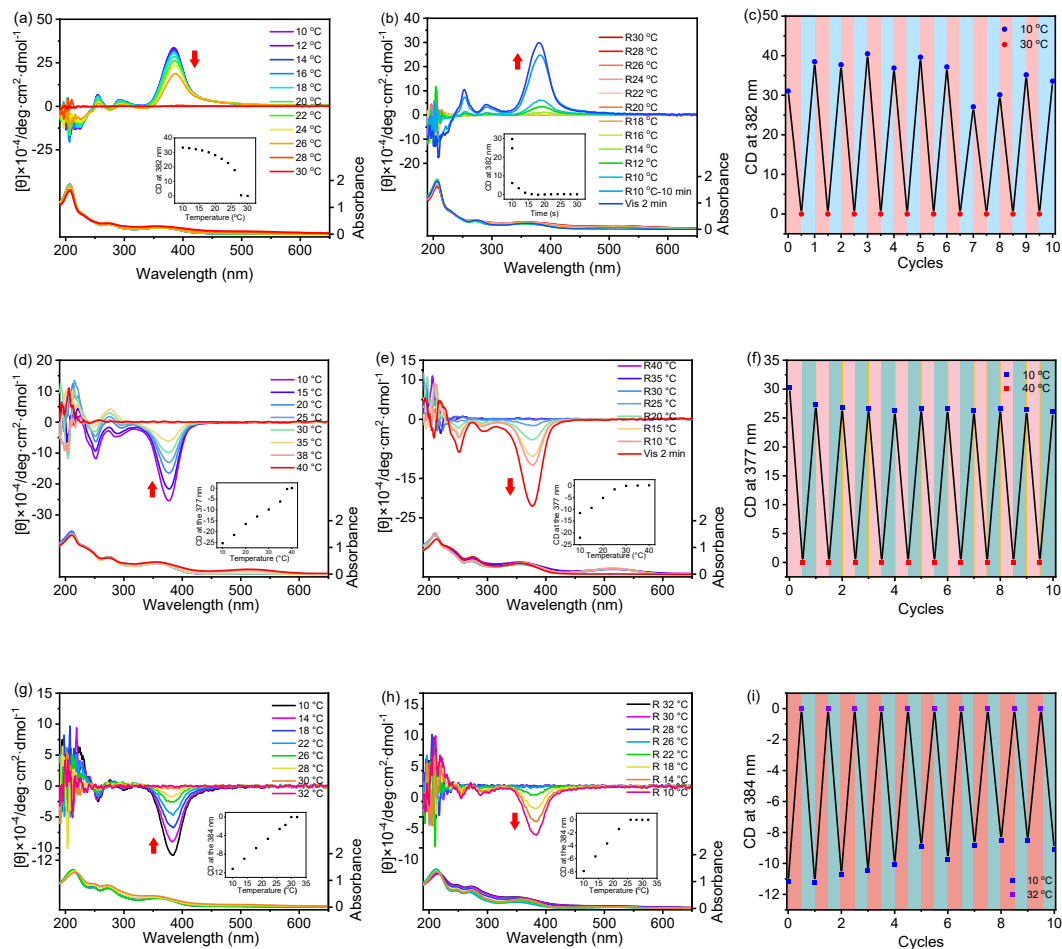

**Fig. S25** CD and UV/vis spectra in aqueous solutions of **SP-GA-EtG1** through heating (a) and cooling (b), **SP-AG-MeG1** through heating (d) and cooling (e), **MeG1-GA-SP** through heating (g) and cooling (h), as well as the first Cotton effect at around 380 nm ( $\theta_{380}$ ) after several cycles heating and cooling (through irradiation with visible light): **SP-GA-EtG1** (c), **SP-AG-MeG1** (f), **MeG1-GA-SP** (i). Inset in (a), (b), (d), (e), (g) and (h): plots of molar ellipticity at around 380 nm ( $\theta$ ) against temperature. Heating rate = 2.0 °C·min<sup>-1</sup>;  $\lambda_{vis}$  > 450 nm; C = 0.3 mg·mL<sup>-1</sup>.

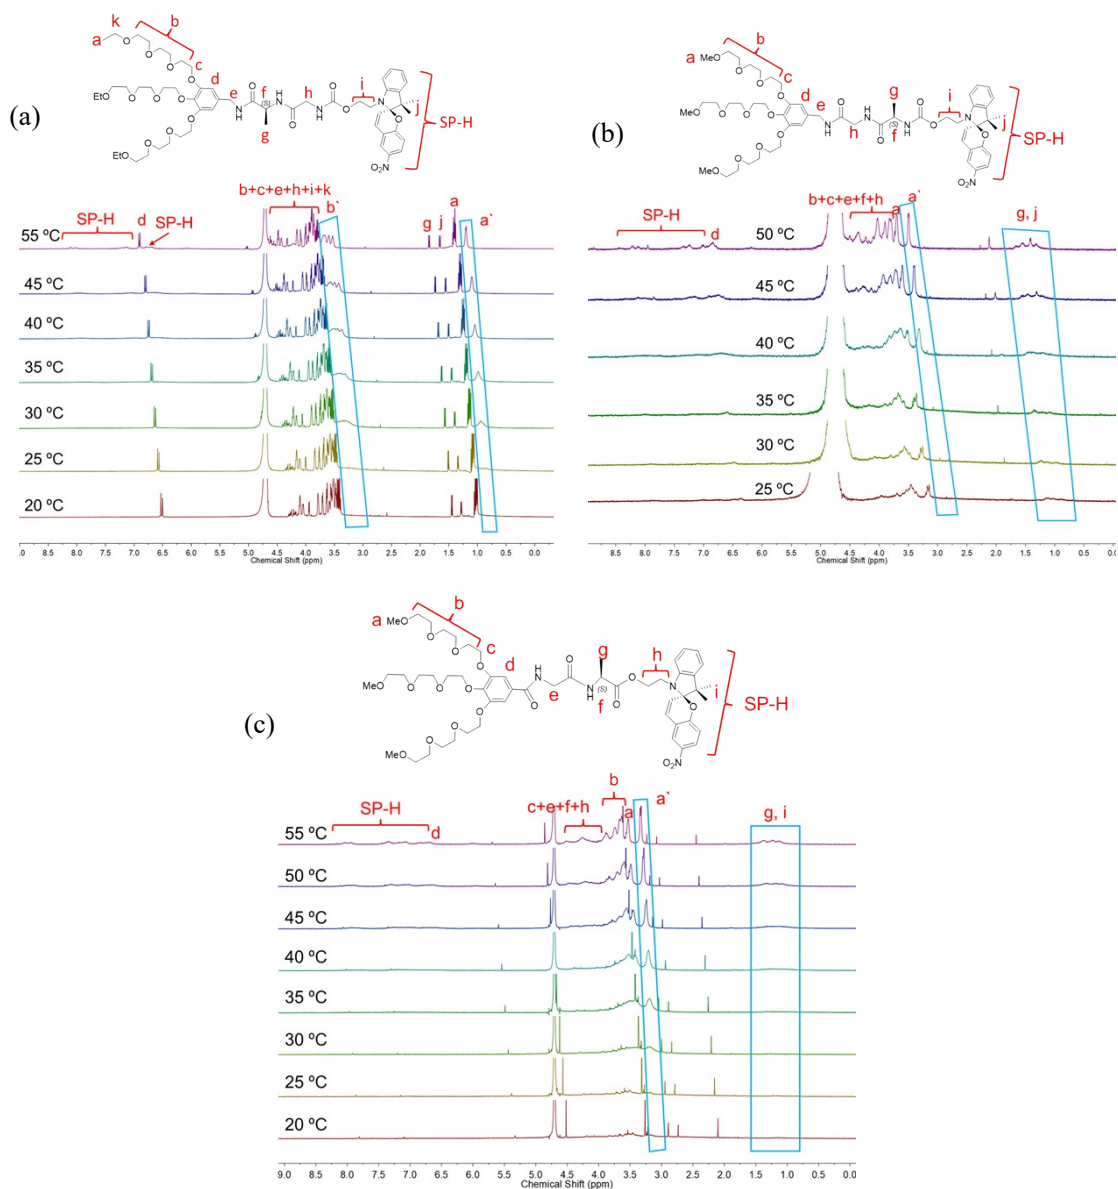

**Fig. S26**  $^1\text{H}$  NMR spectra in  $\text{D}_2\text{O}$  at varied temperatures of SP-GA-EtG1 (a), SP-AG-MeG1 (b) and MeG1-GA-SP (c).  $C = 2.5 \text{ mg}\cdot\text{mL}^{-1}$ .

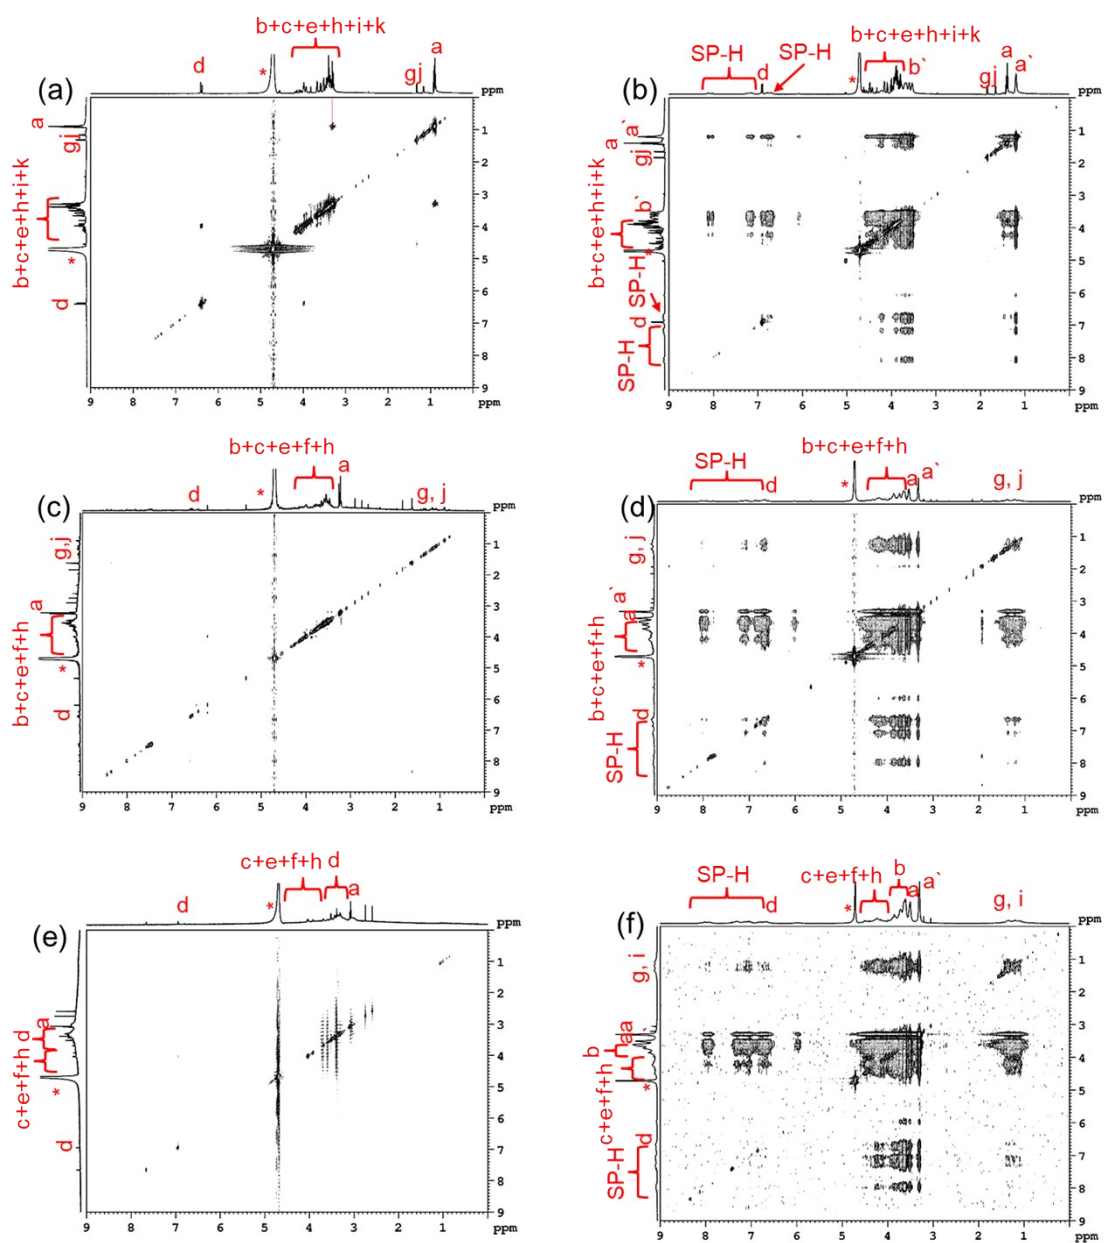

**Fig. S27** NOESY spectra of **SP-GA-EtG1** at 10 °C (a) and 55 °C (b), **SP-AG-MeG1** at 10 °C (c) and 50 °C (d), as well as **MeG1-GA-SP** at 10 °C (e) and 50 °C (f).  $C = 5 \text{ mg} \cdot \text{mL}^{-1}$ .
